# Supplementary material
Source: publisher site journal article supplement (https://www.dovepress.com/article/302241)
Supplement: Supplementary file 1 [file get_supplementary_file.php]

Development and validation of a healthcare utilization-based algorithm to identify acute exacerbations of chronic obstructive pulmonary disease

Douglas W Mapel, Melissa H Roberts, Susan Sama, Priyanka J Bobbili, Wendy Y Cheng, Mei Sheng Duh, Catherine Nguyen, Philippe Thompson-Leduc, Melissa K Van Dyke, Kieran J Rothnie, Devi Sundaresan, Julia M Certa, Thomas S Whiting, Jennifer L Brown, Douglas W Roblin

**Supplementary Appendix**

**Supplementary Table 1** COPD-related medications recommended for the initial pharmacologic management of COPD according to GOLD guidelines (alone or in combination)

| **Name of medication class** | **Name of medication** |
| --- | --- |
| **Short-acting inhaled Beta-2 agonists (SABA)** | Albuterol |
| Fenoterol |
| Bitolterol |
| Isoetharine |
| Isoproterenol |
| Levalbuterol |
| Metaproterenol |
| Pirbuterol |
| Terbutaline |
| **Inhaled Corticosteroids (ICS)** | Fluticasone |
| Budesonide |
| Beclomethasone |
| Flunisolide |
| Triamcinolone |
| **Long-acting Beta-agonists (LABA)** | Formoterol |
| Salmeterol |
| Indacaterol |
| Tulobuterol |
| Arformoterol |
| **ICS/LABA** | Fluticasone + Salmeterol (all doses) |
| Formoterol + Mometasone |
| Vilanterol + Fluticasone |
| Budesonide + Formoterol |
| **Short-acting muscarinic antagonist (SAMA)** | Inhaled (non-nebulized) Ipratropium Nebulized Ipratropium or Ipratropium/Albuterol combination |
| Oxytropium bromide |
| **Long-acting muscarinic antagonist (LAMA)** | Tiotropium |
| Aclidinium bromide |
| Glycopyrronium bromide |
| Umeclidinium |
| **LABA+Anticholinergic** | Vilanterol + Umeclidinium |
| Indacaterol + Glycopyrronium |
| **Phosphodiesterase-4 Inhibitor** | Roflumilast |
| **Source:** Gold Initiative for Chronic Obstructive Pulmonary Disease, Global strategy for the diagnosis, management, and prevention of chronic obstructive pulmonary disease. Updated 2016. Available at: http://goldcopd.org/global-strategy-diagnosis-management-prevention-copd-2016/ | |

**Supplementary Table 2** Case Report Form extraction form considerations

**Abbreviations:** AECOPD, acute exacerbation of chronic obstructive pulmonary disease; BMI, body mass index; COPD, chronic obstructive pulmonary disease; DMG, disease management group; ER, emergency room; FEV1, forced expiratory volume over 1 second; FVC, forced vital capacity; ICS, inhaled corticosteroid; ID, identifier; LAA, long-acting anticholinergic; LABA, long-acting Beta-agonist; LAMA, long-acting muscarinic antagonist; PSVT, paroxysmal supraventricular tachycardia; SABA, short-acting Beta-agonist; SAMA, short-acting muscarinic antagonist.

**Supplementary Table 3** Utilization items associated with AECOPD events (minor criteria)

| Cigarette smoking history ≥10 pack-years or other documented respiratory exposure known to cause COPD |
| --- |
| A chest X-ray or chest CT scan obtained at any time interpreted as being consistent with COPD |
| Spirometry or complete PFT obtained at any time that are consistent with COPD |
| Documentation of physical exam findings within ±30 days of the utilization event that are consistent with COPD or acute COPD exacerbation |
| Documentation of acute or chronic hypoxemia or hypercarbia within ±30 days of the  utilization event |
| Absence of acute coronary syndrome, congestive heart failure or other severe confounding comorbidity as the primary cause of the utilization event |
| A physician or provider describes or diagnoses the event as a COPD exacerbation |
| Documentation of inhaled respiratory medication use at any time |
| Documentation that a sputum culture or viral screen was obtained within ±30 days of the utilization event |
| Documentation that a complete blood count was obtained within ±30 days of the utilization event |
| Documentation that pulse oximetry or an arterial blood gas was obtained within ±30 days of the utilization event |
| Documentation that an ECG or echocardiogram was obtained within ±30 days of the utilization event |

**Abbreviations:** AECOPD, acute exacerbation of chronic obstructive pulmonary disease; COPD, chronic obstructive pulmonary disease; CT, computed tomography scan; ECG, electrocardiogram; PFT, pulmonary function tests.

**Supplementary Table 4** Validation results of moderate AECOPD algorithm and its components by COPD status

| **Abstracted N [N=298], PPV (95% CI)** | | | | | | |
| --- | --- | --- | --- | --- | --- | --- |
|  | **COPD verified n=137 [46.0%]** | | **COPD unverified n=60 [20.1%]** | | **COPD undefined n=101 [33.9%]** | |
| Overall (any code) | 137 | 98.5 (94.8, 99.8) | 60 | 98.3 (91.1, 100.0) | 101 | 98.0 (93.0, 99.8) |
| By specific ICD-9-CM code: |  |  |  |  |  |  |
| Cough (786.2) | 20 | 100.0 (83.2, 100.0) | 12 | 100.0 (73.5, 100.0) | 31 | 100.0 (88.8, 100.0) |
| Chronic bronchitis (491.x) | 36 | 100.0 (90.3, 100.0) | 13 | 92.3 (64.0, 99.8) | 29 | 100.0 (88.1, 100.0) |
| Chronic airway obstruction, not elsewhere classified (496.x) | 45 | 95.6 (84.9, 99.5) | 12 | 100.0 (73.5, 100.0) | 25 | 96.0 (79.6, 99.9) |
| Dyspnea and respiratory abnormalities (786.0) | 20 | 100.0 (83.2, 100.0) | 10 | 100.0 (69.2, 100.0) | 19 | 94.7 (74.0, 99.9) |
| Shortness of breath (786.05) | 8 | 100.0 (63.1, 100.0) | 4 | 100.0 (39.8, 100.0) | 12 | 91.7 (61.5, 99.8) |
| Acute bronchitis and bronchiolitis (466.x) | 1 | 100.0 (2.5, 100.0) | 4 | 100.0 (39.8, 100.0) | 5 | 100.0 (47.8, 100.0) |
| Chest pain (786.5) | 5 | 100.0 (47.8, 100.0) | 6 | 100.0 (54.1, 100.0) | 6 | 100.0 (54.1, 100.0) |
| Pneumonia, organism unspecified (486.x) | 6 | 100.0 (54.1, 100.0) | 3 | 100.0 (29.2, 100.0) | 9 | 100.0 (66.4, 100.0) |
| Emphysema (492.x) | 2 | 100.0 (15.8, 100.0) | 2 | 100.0 (15.8, 100.0) | 2 | 100.0 (15.8, 100.0) |
| Wheezing (786.07) | 2 | 100.0 (15.8, 100.0) | 1 | 100.0 (2.5, 100.0) | 1 | 100.0 (2.5, 100.0) |
| Asthma, unspecified type, with acute exacerbation (493.92) | 3 | 100.0 (29.2, 100.0) | 3 | 100.0 (29.2, 100.0) | 2 | 100.0 (15.8, 100.0) |
| Chronic obstructive asthma with acute exacerbation (493.22) | 2 | 100.0 (15.8, 100.0) | 2 | 100.0 (15.8, 100.0) | 1 | 100.0 (2.5, 100.0) |
| Acute and chronic respiratory failure (518.84) | - | - | 1 | 100.0 (2.5, 100.0) | - | - |
| Asphyxia and hypoxemia (799.0x) | 2 | 100.0 (15.8, 100.0) | - | - | 2 | 100.0 (15.8, 100.0) |
| Chronic obstructive asthma, unspecified (493.20) | 1 | 100.0 (2.5, 100.0) | 1 | 100.0 (2.5, 100.0) | - | - |
| Acute respiratory failure (518.81) | 1 | 100.0 (2.5, 100.0) | - | - | - | - |
| Other pulmonary insufficiency not elsewhere classified (518.82) | - | - | - | - | - | - |
| Bronchitis, not specified as acute or chronic (490.x) | 9 | 100.0 (66.4, 100.0) | 5 | 100.0 (47.8, 100.0) | 3 | 100.0 (29.2, 100.0) |
| By specific medication group based on GPI/CPT codes: |  |  |  |  |  |  |
| Antibiotics | 94 | 97.9 (92.5, 99.7) | 43 | 97.7 (87.7, 99.9) | 72 | 97.2 (90.3, 99.7) |
| Systemic corticosteroids | 93 | 98.9 (94.2, 100.0) | 35 | 100.0 (90.0, 100.0) | 55 | 100.0 (93.5, 100.0) |
| Methylxanthines | - | - | - | - | 2 | 100.0 (15.8, 100.0) |
| **Notes:** Patients with AECOPD events that had missing or unavailable EMR were excluded from the analysis because adjudication of these events was not possible. Stable spirometry test results from EMR that occurred after the beginning of the study period (01/01/2010) and prior to the claims-identified exacerbation event but outside the chart abstraction period (30 days) were used to define these categories. If no other spirometry test was available, the spirometry test within the chart abstraction period but not within 7 days prior to the claims-identified exacerbation event was used. The GOLD definition of FEV1/FVC<0.7 was applied to categorize patients as “COPD verified”. Those with FEV1/FVC>0.7 were categorized as “COPD unverified”, and those with missing spirometry results were classified as “COPD undefined”. Confirmed true positive AECOPD events used in the calculation of PPV included definite, probable, or possible exacerbation events, as classified by the adjudicator, in the primary analysis.  **Abbreviations:** AECOPD, acute exacerbation of chronic obstructive pulmonary disease; CI, confidence interval; COPD, chronic obstructive pulmonary disease; CPT, current procedural terminology; ED, emergency department; EMR, electronic medical record; FEV1, forced expiratory volume over 1 second; FVC, forced vital capacity; GOLD, The Global Initiative for Chronic Obstructive Lung Disease; GPI, generic product identifier; ICD-9-CM, International Classification of Diseases, 9th Revision, Clinical Modification; PPV, positive predictive value. | | | | | | |

**Supplementary Table 5** Validation results of severe AECOPD algorithm and its components by COPD status

| **Abstracted N [N=225], PPV (95% CI)** | | | | | | |
| --- | --- | --- | --- | --- | --- | --- |
|  | **COPD verified n=96 [42.7%]** | | **COPD unverified n=30 [13.3%]** | | **COPD undefined n=99 [44.0%]** | |
| Overall (any code) | 96 | 93.8 (86.9, 97.7) | 30 | 96.7 (82.8, 99.9) | 99 | 98.0 (92.9, 99.8) |
| By specific ICD-9-CM code: |  |  |  |  |  |  |
| Chronic bronchitis (491.x) | 43 | 97.7 (87.7, 99.9) | 12 | 91.7 (61.5, 99.8) | 46 | 100.0 (92.3, 100.0) |
| Chronic airway obstruction, not elsewhere classified (496.x) | 34 | 91.2 (76.3, 98.1) | 7 | 100.0 (59.0, 100.0) | 43 | 95.3 (84.2, 99.4) |
| Acute respiratory failure (518.81) | 26 | 96.2 (80.4, 99.9) | 11 | 100.0 (71.5, 100.0) | 21 | 100.0 (83.9, 100.0) |
| Emphysema (492.x) | 18 | 94.4 (72.7, 99.9) | 3 | 100.0 (29.2, 100.0) | 9 | 100.0 (66.4, 100.0) |
| Acute and chronic respiratory failure (518.84) | 13 | 100.0 (75.3, 100.0) | 1 | 100.0 (2.5, 100.0) | 4 | 100.0 (39.8, 100.0) |
| Other pulmonary insufficiency not elsewhere classified (518.82) | 2 | 100.0 (15.8, 100.0) | - | - | 6 | 100.0 (54.1, 100.0) |
| Chronic obstructive asthma with (acute) exacerbation (493.22) | 3 | 100.0 (29.2, 100.0) | - | - | 5 | 100.0 (47.8, 100.0) |
| Chronic obstructive asthma, unspecified (493.20) | 1 | 100.0 (2.5, 100.0) | - | - | 1 | 100.0 (2.5, 100.0) |
| **Notes:** Patients with AECOPD events that had missing or unavailable EMR were excluded from the analysis because adjudication of these events was not possible. Stable spirometry test results from EMR that occurred after the beginning of the study period (01/01/2010) and prior to the claims-identified exacerbation event but outside the chart abstraction period (30 days) were used to define these categories. If no other spirometry test was available, the spirometry test within the chart abstraction period but not within 7 days prior to the claims-identified exacerbation event was used. The GOLD definition of FEV1/FVC<0.7 was applied to categorize patients as “COPD verified”. Those with FEV1/FVC>0.7 were categorized as “COPD unverified”, and those with missing spirometry results were classified as “COPD undefined”. Confirmed true positive AECOPD events used in the calculation of PPV included definite, probable, or possible exacerbation events, as classified by the adjudicator, in the primary analysis. **Abbreviations:** AECOPD, acute exacerbation of chronic obstructive pulmonary disease; CI, confidence interval; CPT, current procedural terminology; ED, emergency department; EMR, electronic medical record; GPI, generic product identifier; ICD-9-CM, International Classification of Diseases, 9th Revision, Clinical Modification; PPV, positive predictive value. | | | | | | |

**Supplementary Table 6** ICD-10-CM diagnosis codes for identifying moderate COPD-related exacerbations

| **Code** | **Description** |
| --- | --- |
| J18 | Pneumonia, unspecified organism |
| J20 | Acute bronchitis |
| J21 | Acute bronchiolitis |
| J22 | Unspecified acute lower respiratory infection |
| J40 | Bronchitis, not specified as acute or chronic |
| J41 | Simple and mucopurulent chronic bronchitis |
| J42 | Unspecified chronic bronchitis |
| J43 | Emphysema |
| J44.0 | Chronic obstructive pulmonary disease with acute lower respiratory infection |
| J44.1 | Chronic obstructive pulmonary disease with (acute) exacerbation |
| J44.9 | Chronic obstructive pulmonary disease, unspecified |
| J45.901 | Unspecified asthma with (acute) exacerbation |
| J80 | Acute respiratory distress syndrome |
| J96.0 | Acute respiratory failure |
| J96.2 | Acute and chronic respiratory failure |
| J96.9 | Respiratory failure, unspecified |
| R05 | Cough |
| R06.0 | Dyspnea |
| R06.2 | Wheezing |
| R06.3 | Periodic breathing |
| R06.8 | Other abnormalities of breathing |
| R07.1 | Chest pain on breathing |
| R07.2 | Precordial pain |
| R07.8 | Other chest pain |
| R07.9 | Chest pain, unspecified |
| R09.0 | Asphyxia and hypoxemia |

**Abbreviations:** AECOPD, acute exacerbation of chronic obstructive pulmonary disease; ICD-10-CM, International Classification of Diseases, 10th Revision, Clinical Modification.

**Supplementary Table 7** ICD-10-CM diagnosis codes for identifying severe COPD-related exacerbations

| **Code** |  | **Description** |
| --- | --- | --- |
| J22 |  | Unspecified acute lower respiratory infection |
| J41 |  | Simple and mucopurulent chronic bronchitis |
| J42 |  | Unspecified chronic bronchitis |
| J43 |  | Emphysema |
| J44.0 |  | Chronic obstructive pulmonary disease with acute lower respiratory infection |
| J44.1 |  | Chronic obstructive pulmonary disease with (acute) exacerbation |
| J44.9 |  | Chronic obstructive pulmonary disease, unspecified |
| J80 |  | Acute respiratory distress syndrome |
| J96.0 |  | Acute respiratory failure |
| J96.2 |  | Acute and chronic respiratory failure |
| J96.9 |  | Respiratory failure, unspecified |
| R06.03 |  | Acute respiratory distress |

**Abbreviations:** AECOPD, acute exacerbation of chronic obstructive pulmonary disease; ICD-10-CM, International Classification of Diseases, 10th Revision, Clinical Modification.
